# Supplementary material for: Facile synthesis of yellow fluorescent carbon dots for highly sensitive sensing of cobalt ions and biological imaging
Source: Royal Society of Chemistry journal article supplement (doi:10.1039/c9ay01244c), 2019-01-01
Supplement: c9ay01244c1.pdf [file c9ay01244c1.pdf]

# Facile synthesis yellow fluorescent carbon dots for highly sensitive sensing cobalt ions and biological imaging

Min Tian <sup>a</sup>, Yaoming Liu <sup>b</sup>, Yingte Wang <sup>a</sup>, Yong Zhang <sup>a,\*</sup>

<sup>a</sup> School of Chemistry and Chemical Engineering, Shanxi University, Taiyuan 030006, China

<sup>b</sup> Scientific Instrument Center, Shanxi University, Taiyuan 030006, China

\* Corresponding author Email: zhangyong@sxu.edu.cn

## Experimental

### Materials

O-phenylenediamine, urea,  $\text{Al}_2(\text{SO}_4)_3$ ,  $\text{CdSO}_4 \cdot 8\text{H}_2\text{O}$ ,  $\text{CoSO}_4 \cdot 7\text{H}_2\text{O}$ ,  $\text{Cr}_2(\text{SO}_4)_3 \cdot 6\text{H}_2\text{O}$ ,  $\text{FeSO}_4$ ,  $\text{FeCl}_3 \cdot 6\text{H}_2\text{O}$ ,  $\text{HgCl}_2$ ,  $\text{KCl}$ ,  $\text{MgCl}_2 \cdot 6\text{H}_2\text{O}$ ,  $\text{MnSO}_4 \cdot \text{H}_2\text{O}$ ,  $\text{Ni}(\text{NO}_3)_2 \cdot 6\text{H}_2\text{O}$ ,  $\text{Pb}(\text{NO}_3)_2$ ,  $\text{Zn}(\text{NO}_3)_2 \cdot 6\text{H}_2\text{O}$ ,  $\text{CuSO}_4 \cdot 5\text{H}_2\text{O}$ , 2,4-dichlorophenol, phenol, benzyl alcohol, benzoic acid, m-nitrobenzoic acid, o-nitrobenzoic acid, o-nitrotoluene, nitrobenzene, ammonium nitrate, ethyl alcohol, Rhodamine 6 G were all analytical grade. O-phenylenediamine was purchased from Tianjin Zhiyuan Chemical Reagent Co, Ltd. Other chemicals were obtained from Aladdin (Shanghai, China). High purity water with a resistivity of 18.2 MΩ cm was obtained from Molelement element ultra pure water machine. Dialysis bag (1000 Da) was purchased from Shanghai Chemical Reagent company (Shanghai, China). B-Complex B-12 (250 mg/tablet) was purchased from guoda

drugstore. Tap water was obtained from ShanXi University. *Zebrafish* were collected from School of Life Sciences, Shanxi University.

## **Characterization**

The morphology and structure of the N-CDs were analyzed by a transmission electron microscope (TEM) (JEOL, JEM-2100), operating at 200 kV) (Tokyo, Japan). The Fourier transform infrared spectra of the N-CDs was performed using Nicolet iS50 FT-IR spectrometer (Thermo Scientific, USA). X-ray photoelectron spectroscopy analysis were acquired on an Escalab 250Xi electron spectrometer (Thermo Fisher Scientific, USA) using monochromatic Al Ka radiation. UV-vis absorption spectra were collected by a Shimadzu Corporation UV-2450 Spectrophotometer with a 1 cm sample cell. Steady-state fluorescence spectra were obtained on a Shimadzu Corporation RF-5301 Spectrophotometer (Tokyo, Japan). The fluorescence lifetimes were taken on a PTI QuantaMaster™400 and PicoMaster 1000-TCSPC spectrofluorometer. ZEISS LSM 880 confocal laser scanning microscope was employed for biological imaging.

## **Quantum yield measurement**

The quantum yield (QY) of N-CDs was calculated by comparing the fluorescence intensities and absorption values of N-CDs solution with

Rhodamine 6 G (excitation wavelength: 488 nm, quantum yield 0.94, dissolved in ethanol). In order to minimize re-absorption effect, the absorbance of the N-CDs solution was kept below 0.05. The QY was measured based on the following equation:

$$Q_C = Q_R * I_C/I_R * A_R/A_C * (n_C/n_R)^2$$

where Q is the QY, I refers to the integrated emission intensity, A is the absorbance at excitation wavelength, and n represents the refractive index of the solvent. The subscript “R” and “C” stand for standard with known QY and the sample, respectively.

### **Toxicity assays**

The *Zebrafish* were cultured in E3 embryo media (15 mM NaCl, 0.5 mM KCl, 1 mM MgSO<sub>4</sub>, 1 mM CaCl<sub>2</sub>, 0.15 mM KH<sub>2</sub>PO<sub>4</sub>, 0.05 mM Na<sub>2</sub>HPO<sub>4</sub>, 0.7 mM NaHCO<sub>3</sub>, 5 – 10% methylene blue; pH 7.5) at 28 °C for 4 days. After that, the N-CDs powder were configured into 6 gradient concentrations with E3 embryo media (12.5, 25, 50, 100, 200, 300 mg mL<sup>-1</sup>, respectively). Then, putting each concentration N-CDs solution (5 mL) and *Zebrafish* (10 pieces) into culture dish successively and incubating for 24 h. Finally, calculating the semi-lethal concentration by mortality data, and the corresponding concentration with a mortality rate of less-than 8% was selected for imaging experiments.

## **Biological imaging**

The *Zebrafish* (4 days old) were interacted with N-CDs and N-CDs+Co<sup>2+</sup> for 1 h at 28°C, respectively. Then, the *Zebrafish* was further incubated with HSO<sub>3</sub><sup>-</sup> (200 μM) for 1 h. After washed with PBS, the *Zebrafish* were imaged by a ZEISS LSM 880 confocal laser scanning microscope.

## **Results and Discussion**

### **Stability of N-CDs**

To explore the assay conditions of the N-CDs employed as a fluorescent probe in Co<sup>2+</sup> detection, we optimized some analytical conditions. First, the pH-dependence of the N-CDs solutions was determined by measuring the fluorescence intensities over a pH range. The fluorescence intensity was maximized at pH=8, so pH=8 was chosen for the next sets of experiments (Fig. S1a). The pH-sensitive characteristic relates to the surface protonation and deprotonation of N-CDs. The fluorescence intensity of the N-CDs was insensitive to NaCl concentration (Fig. S1b), guaranteeing the applicability of the N-CDs in biological labeling and environmental analysis. The effect of incubation time on the fluorescence intensity of the N-CDs - Co<sup>2+</sup> system was shown in Fig. S1c. The fluorescence intensity was notably stable within 3 mins, so 3 mins was selected as the incubation time in the follow-up

experiments.

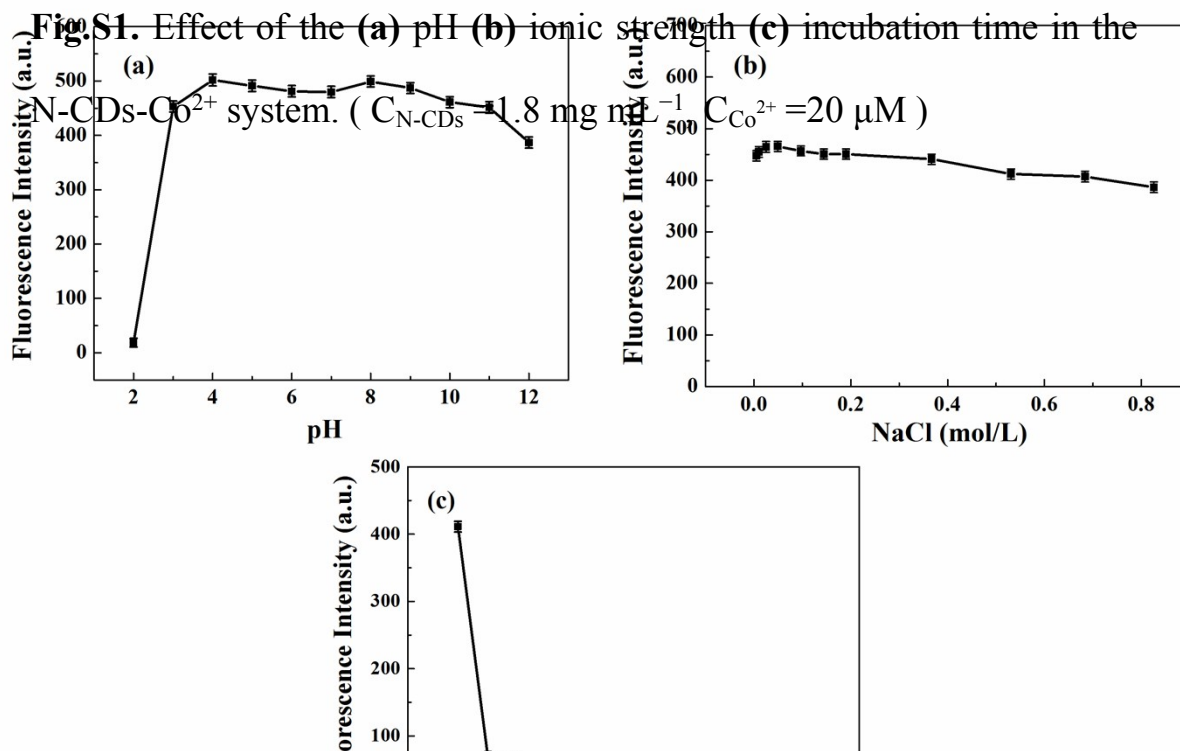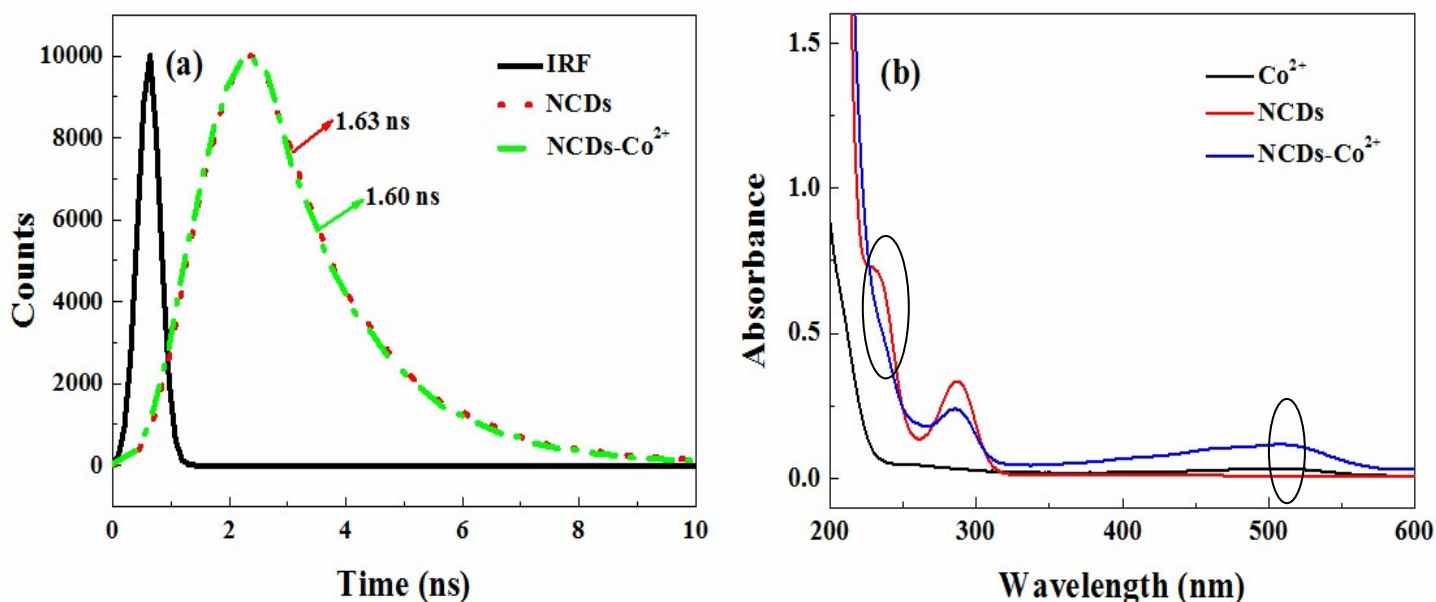

**Fig.S2.** (a) Fluorescence lifetime curves of the IRF and N-CDs in the absence/presence of  $\text{Co}^{2+}$ . (b) UV-vis absorption of the  $\text{Co}^{2+}$ , N-CDs and

N-CDs-Co<sup>2+</sup>.
